# Supplementary material
Source: PubMed Central journal article supplement (PMC11482170)
Supplement: boe-15-10-6024-s001.pdf [file boe-15-10-6024-s001.pdf]

## Stimulated Brillouin scattering flow cytometry: supplement

**JAKE R. ROSVOLD,<sup>1</sup> GIULIA ZANINI,<sup>1</sup>  CHENCHEN HANDLER,<sup>2</sup> ERIC FRANK,<sup>1</sup> JIARUI LI,<sup>1</sup>  MICHELE I. VITOLO,<sup>3,4</sup> STUART S. MARTIN,<sup>3,4</sup> AND GIULIANO SCARCELLI<sup>1,\*</sup> **

<sup>1</sup>Fischell Department of Bioengineering, University of Maryland, 8278 Paint Branch Drive, College Park, MD 20742, USA

<sup>2</sup>Department of Mechanical Engineering, A. James Clark School of Engineering, University of Maryland, College Park, MD 20742, USA

<sup>3</sup>Department of Pharmacology, University of Maryland School of Medicine, Baltimore, MD, USA

<sup>4</sup>Marlene and Stewart Greenbaum Comprehensive Cancer Center, University of Maryland School of Medicine, Baltimore, MD 21201, USA

\*[scarc@umd.edu](mailto:scarc@umd.edu)

---

This supplement published with Optica Publishing Group on 25 September 2024 by The Authors under the terms of the [Creative Commons Attribution 4.0 License](https://creativecommons.org/licenses/by/4.0/) in the format provided by the authors and unedited. Further distribution of this work must maintain attribution to the author(s) and the published article's title, journal citation, and DOI.

Supplement DOI: <https://doi.org/10.6084/m9.figshare.26966365>

Parent Article DOI: <https://doi.org/10.1364/BOE.537602>

# Stimulated Brillouin scattering flow cytometry

JAKE R. ROSVOLD,<sup>1</sup> GIULIA ZANINI,<sup>1</sup> CHENCHEN HANDLER,<sup>2</sup> ERIC FRANK,<sup>1</sup> JIARUI LI,<sup>1</sup> MICHELE I. VITOLO,<sup>3,4</sup> STUART S. MARTIN,<sup>3,4</sup> AND GIULIANO SCARCELLI<sup>1+</sup>

<sup>1</sup>Fischell Department of Bioengineering, University of Maryland, 8278 Paint Branch Drive, College Park, MD 20742, USA

<sup>2</sup>Department of Mechanical Engineering, A. James Clark School of Engineering, University of Maryland, College Park, MD 20742, USA

<sup>3</sup>Department of Pharmacology, University of Maryland School of Medicine, Baltimore, MD, USA

<sup>4</sup>Marlene and Stewart Greenbaum Comprehensive Cancer Center, University of Maryland School of Medicine, Baltimore, MD 21201, USA

[+scarc@umd.edu](mailto:scarc@umd.edu)

## Supplementary Figure:

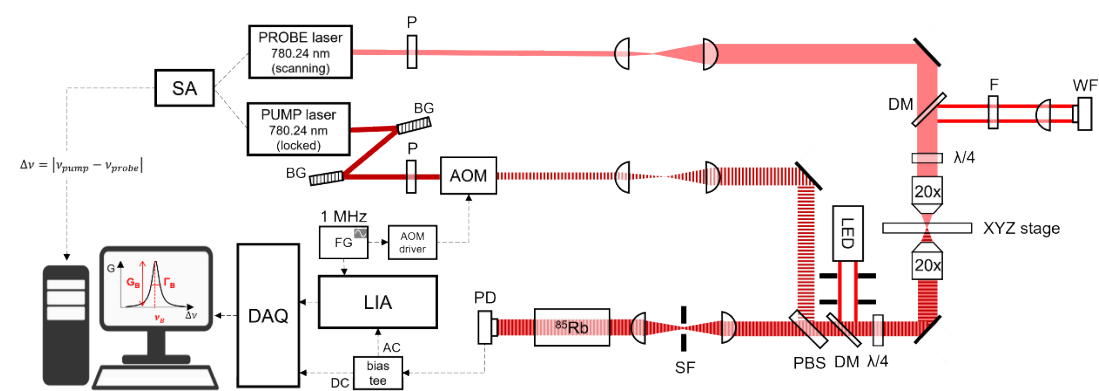

**Fig. S1.** Schematic of CW SBS spectrometer used in this work. P: polarizer,  $\lambda/4$ : quarter-wave plate, DM: dichroic mirror, PBS: polarizing beam splitter, SF: spatial filter, PD: photodetector, AOM: acousto-optic modulator, DAQ: data acquisition card, SA: signal analyzer, BG: bragg grating, FG: function generator, LIA: lock-in amplifier, LED: light emitting diode, Rb: Rubidium, F: filter.
